# Supplementary material
Source: HighWire-hosted journal article supplement (https://www.ijssurgery.com/content/17/S1/S45)
Supplement: inline-supplementary-material-1 [file inline-supplementary-material-1.docx]

|  | **PathFX  (2020)** | **SORG-ML (2019)** | **SpineMet (2019)** | **NESMS  (2015)** | **Bollen (2014)** | **New Katagiri (2014)** | **OSRI  (2013)** | **Modified Bauer Score  (2008)** | **Mizumoto (2008)** | **Revised Tokuhashi (2005)** | **van der Linden (2005)** | **Tomita Score (2001)** | | **Sioutos  (1995)** |
| --- | --- | --- | --- | --- | --- | --- | --- | --- | --- | --- | --- | --- | --- | --- |
| **Demographics** | | | | | | | | | | | | | | |
| Age |  |  |  |  |  |  |  |  |  |  |  |  | |  |
| Gender |  |  |  |  |  |  |  |  |  |  |  |  | |  |
| Body mass index |  |  |  |  |  |  |  |  |  |  |  |  | |  |
| **Clinical status** | | | | | | | | | | | | | | |
| Comorbidities |  |  |  |  |  |  |  |  |  |  |  |  | |  |
| Functional status |  |  |  |  |  |  |  |  |  |  |  |  | |  |
| Neurological status |  |  |  |  |  |  |  |  |  |  |  |  | |  |
| **Oncology** | | | | | | | | | | | | | | |
| Primary tumor type |  |  |  |  |  |  |  |  |  |  |  |  |  | |
| Metastasis locations |  |  |  |  |  |  |  |  |  |  |  |  |  | |
| Pathological fracture |  |  |  |  |  |  |  |  |  |  |  |  |  | |
| Previous systemic therapy |  |  |  |  |  |  |  |  |  |  |  |  |  | |
| **Laboratory values** | | | | | | | | | | | | | | |
| Calcium |  |  |  |  |  |  |  |  |  |  |  |  |  | |
| Creatinine |  |  |  |  |  |  |  |  |  |  |  |  |  | |
| Total bilirubin |  |  |  |  |  |  |  |  |  |  |  |  |  | |
| Alkaline phosphatase |  |  |  |  |  |  |  |  |  |  |  |  |  | |
| LDH |  |  |  |  |  |  |  |  |  |  |  |  |  | |
| Albumin |  |  |  |  |  |  |  |  |  |  |  |  |  | |
| CRP |  |  |  |  |  |  |  |  |  |  |  |  |  | |
| Hemoglobin |  |  |  |  |  |  |  |  |  |  |  |  |  | |
| Platelet count |  |  |  |  |  |  |  |  |  |  |  |  |  | |
| White blood cell count |  |  |  |  |  |  |  |  |  |  |  |  |  | |
| Absolute neutrophil count |  |  |  |  |  |  |  |  |  |  |  |  |  | |
| Absolute lymphocyte count |  |  |  |  |  |  |  |  |  |  |  |  |  | |
| INR |  |  |  |  |  |  |  |  |  |  |  |  |  | |
| **Medication** | | | | | | | | | | | | | | |
| Regular Analgesic |  |  |  |  |  |  |  |  |  |  |  |  |  | |
| Abbreviations; SORG-ML = SORG Oncology Research Group - Machine Learning, NESMS = New England Spinal Metastasis Score, OSRI = Oswestry Spinal Risk Index, INR = Internationalized Normalized Ratio. Note: These input variables have been simplified for clarity purposes. For detailed input variables, we refer to the original articles. Date: The year below the scoring model is the year that the model is published or last updated. | | | | | | | | | | | | | | |
